# Supplementary material for: Cerebral O2 and CO2 transport in isovolumic haemodilution: Compensation of cerebral delivery of O2 and maintenance of cerebrovascular reactivity to CO2
Source: PubMed Central journal article supplement (PMC9875354; doi:10.1177/0271678x221119442), 2022-09-21
Supplement: sj-pdf-1-jcb-10.1177_0271678X221119442.pdf [file sj-pdf-1-jcb-10.1177_0271678X221119442.pdf]

## Calculations

Volumetric cerebral blood flow was calculated as follows:

$$\text{Equation 1: ICA or VA flow (mL/min)} = \left(\frac{1}{2} \cdot \text{Peak Envelope Velocity}\right) \times \left(\pi \left(\frac{1}{2} \cdot \text{diameter}\right)^2\right) \times 60$$

Global CBF (gCBF) was calculated as twice the sum of our unilateral ICA and VA measurements, acknowledging potential limitations <sup>1</sup>:

$$\text{Equation 2: gCBF (mL/min)} = 2 \times (\text{ICA flow} + \text{VA flow}).$$

CVR was determined by the slope of the relationships between gCBF and PaCO<sub>2</sub> (repeated with MCA<sub>v</sub> and PCA<sub>v</sub>). Shear stress was calculated as the product of shear rate and whole blood viscosity measured at 225 s<sup>-1</sup>:

$$\text{Equation 3: shear stress (dyne/cm}^2\text{)} = \text{shear rate (s}^{-1}\text{)} \cdot (\text{whole blood viscosity (cP)} / 100).$$

To account for cerebral perfusion pressure (CPP = MAP – jugular venous pressure) in our analyses of the CBF responses, cerebrovascular conductance (CVC) was subsequently calculated:

$$\text{Equation 4: CVC (mL/min} \cdot \text{mm Hg}^{-1}\text{)} = \frac{\text{gCBF (mL/min)}}{\text{CPP (mm Hg)}}$$

CVR of CVC was determined by the slope of the relationship between CVC and PaCO<sub>2</sub>. Oxygen extraction fraction (OEF) - defined as the fraction of O<sub>2</sub> extracted from the arterial blood - is expressed as a percentage, where an increase can reflect either elevated O<sub>2</sub> consumption, diminished O<sub>2</sub> delivery, or both, and conversely a decrease of OEF can reflect either reduced O<sub>2</sub> consumption, increased O<sub>2</sub> delivery, or both:

$$\text{Equation 5: OEF (\%)} = \frac{\text{CaO}_2 \text{ (mL/dL)} - \text{CvO}_2 \text{ (mL/dL)}}{\text{CaO}_2 \text{ (mL/dL)}} \cdot 100$$

Cerebral delivery of oxygen (CDO<sub>2</sub>):

$$\text{Equation 6: CDO}_2 \text{ (mL/min)} = \frac{\text{gCBF (mL/min)}}{1000} \cdot [\text{CaO}_2 \text{ (mL/dL)} \cdot 10]$$

Cerebral metabolic rate of oxygen consumption (CMRO<sub>2</sub>) was calculated:

$$\text{Equation 7: } \text{CMRO}_2 \text{ (mL/min)} = \frac{\text{gCBF (mL/min)}}{1000} \cdot \{[\text{CaO}_2 \text{ (mL/dL)} - \text{CvO}_2 \text{ (mL/dL)}] \cdot 10\}$$

CO<sub>2</sub> in blood is transported in three main modes; freely dissolved (i.e. that which is measured as PCO<sub>2</sub>), and bound as both bicarbonate (HCO<sub>3</sub><sup>-</sup>), and as carbamate to Hb (HbCO<sub>2</sub>), and it is the latter two by which the majority of CO<sub>2</sub> is carried<sup>2-6</sup>. As such, isovolumic haemodilution would certainly cause not only reduced CaO<sub>2</sub>, but also the reduction of total CO<sub>2</sub> carrying capacity due to reduced [HCO<sub>3</sub><sup>-</sup>] and both erythrocyte-bound and cell-free Hb. Furthermore, at sites such as the capillaries where CO<sub>2</sub> diffuses freely across the vascular wall the appropriate measure is surely as a partial pressure, however, since dehydration and rehydration of CO<sub>2</sub> is catalytically accelerated by carbonic anhydrase to ~2 milliseconds<sup>4</sup>, at sites such as large vessels where blood is conveyed away from tissues and diffusional areas, the partial pressure of CO<sub>2</sub> represents only a fraction of the total CO<sub>2</sub> being transported. As such, we assessed cerebral CO<sub>2</sub> parameters by calculating total arterial and cerebral venous CO<sub>2</sub> content (CCO<sub>2</sub>) per Douglas *et al.* (1988) for comprehensive blood gas interpretation of the changes incurred by haemodilution. First, we calculated the plasma content of CO<sub>2</sub> (PCCO<sub>2</sub>):

$$\text{Equation 8: } \text{PaCCO}_2 \text{ or PvCCO}_2 = 2.226 \cdot s \cdot \text{PCO}_2 \cdot (1 + 10^{\text{pH} - \text{pK}'})$$

Where *s* is the solubility coefficient of CO<sub>2</sub> and pK' is the apparent pK [both calculated per Kelman (1967), with the assumption that core temperature was 37.5°C and unchanged with haemodilution]. PCCO<sub>2</sub> was calculated for both arterial (PCaCO<sub>2</sub>) and jugular venous (PCjvCO<sub>2</sub>) blood using arterial pH, PCO<sub>2</sub>, and pK' for PCaCO<sub>2</sub> and jugular venous pH, PCO<sub>2</sub>, and pK' for PCjvCO<sub>2</sub>. Then, CCO<sub>2</sub>:

$$\text{Equation 9: } \text{CaCO}_2 \text{ or CvCO}_2 = \text{PCCO}_2 \cdot \frac{(1 - 0.0289 \cdot [\text{Hb}])}{(3.352 - 0.456 \times \text{SO}_2) \cdot (8.142 - \text{pH})}$$

Where SO<sub>2</sub> is O<sub>2</sub> saturation. CCO<sub>2</sub> was calculated for both arterial (CaCO<sub>2</sub>) and jugular venous (CjvCO<sub>2</sub>) blood, using arterial Hb, SO<sub>2</sub>, and pH for CaCO<sub>2</sub> and jugular venous Hb, SO<sub>2</sub>, and pH for CjvCO<sub>2</sub>. Then, manipulation of the Fick equation with substitution of CaO<sub>2</sub> and CjvO<sub>2</sub> with CjvCO<sub>2</sub> and CaCO<sub>2</sub>, respectively, allowed for the calculation of the CO<sub>2</sub> insertion fraction (CO<sub>2</sub>IF), defined here as the CO<sub>2</sub> deposited into the jugular venous blood from the cerebral tissues, expressed as a percentage (analogous and inverse to oxygen extraction fraction). An increase in CO<sub>2</sub>IF can reflect either elevated CO<sub>2</sub> production,

diminished CO<sub>2</sub> washout, or both; and, conversely, a decrease of CO<sub>2</sub>IF can reflect either reduced CO<sub>2</sub> production, increased CO<sub>2</sub> washout, or both:

$$\text{Equation 10: } \text{CO}_2\text{IF (\%)} = \frac{C_{jv}\text{CO}_2 \text{ (mL/dL)} - C_{a}\text{CO}_2 \text{ (mL/dL)}}{C_{jv}\text{CO}_2 \text{ (mL/dL)}} \cdot 100$$

We also calculated cerebral CO<sub>2</sub> washout [in the supine position, jugular venous flow represents ~95% of total cerebral outflow<sup>9,10</sup>; as such, we used arterial gCBF (mL/min) in place of global cerebral venous blood flow]:

$$\text{Equation 11: } \text{CO}_2 \text{ washout (mL/min)} = \frac{\text{gCBF (mL/min)}}{1000} \cdot [C_{jv}\text{CO}_2 \text{ (mL/dL)} \cdot 10]$$

As well as the cerebral metabolic rate of CO<sub>2</sub> production (CMR<sub>CO<sub>2</sub></sub>):

$$\text{Equation 12: } \text{CMR}_{\text{CO}_2} \text{ (mL/min)} = \frac{\text{gCBF (mL/min)}}{1000} \cdot \{ [C_{jv}\text{CO}_2 \text{ (mL/dL)} - C_{a}\text{CO}_2 \text{ (mL/dL)}] \cdot 10 \}$$

As another indicator of cerebral CO<sub>2</sub> status, we took C<sub>jv</sub>CO<sub>2</sub> to be an index of cerebral tissue CO<sub>2</sub>. Although the majority of work published to date has utilized PCO<sub>2</sub> values [whether jugular venous, the cerebral a-v difference, or the arithmetic mean+1<sup>11</sup>] as indicators of cerebral tissue or cerebrospinal fluid CO<sub>2</sub>, given that cerebral tissue CO<sub>2</sub> status will change not only with PaCO<sub>2</sub>, but also with CBF, intracellular [H<sup>+</sup>], [HCO<sub>3</sub><sup>-</sup>], and tissue metabolism, and also for the reasons given above for calculation of CO<sub>2</sub> content, we believe that CO<sub>2</sub> content in the cerebral effluent is a suitable marker of cerebral tissue CO<sub>2</sub> in this particular setting.

Given the previous work demonstrating changes in [Hb] may influence NO bioavailability / signal transduction<sup>12-14</sup>, we also calculated trans-cerebral exchange of plasma NO<sub>2</sub><sup>-</sup>:

$$\text{Equation 13: } \text{Plasma NO}_2^- \text{ exchange (nmol/min)} = \frac{\text{gCBF (mL/min)}}{1000} \cdot \left(1 - \frac{\text{Hct}}{100}\right) \cdot [\text{arterial NO}_2^- \text{ (nM)} - \text{jugular venous NO}_2 \text{ (nM)}]$$

Where positive values indicate cerebral net *uptake*, and negative values indicate net *release*.

**Supplemental figures:**

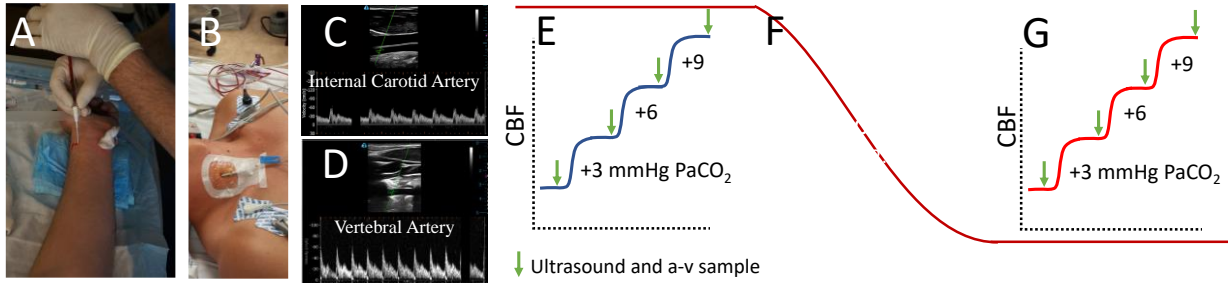

**Supplemental Figure 1. Protocol schematic**

A, B, C, and D represent aspects of instrumentation and measurement (A, placement of radial arterial catheter, B placement of internal jugular venous bulb catheter, C and D are screen captures of internal carotid artery and vertebral artery respectively). E, F, and G represent the protocol; i.e., cerebrovascular reactivity to CO<sub>2</sub> (3 stages of elevated PaCO<sub>2</sub>) followed by haemodilution via blood removal and replacement with Albumin, targeting a ~20% reduction of blood volume, followed by post-haemodilution CVR. Aspects of the diagram have been reproduced with permission from <sup>15</sup>.

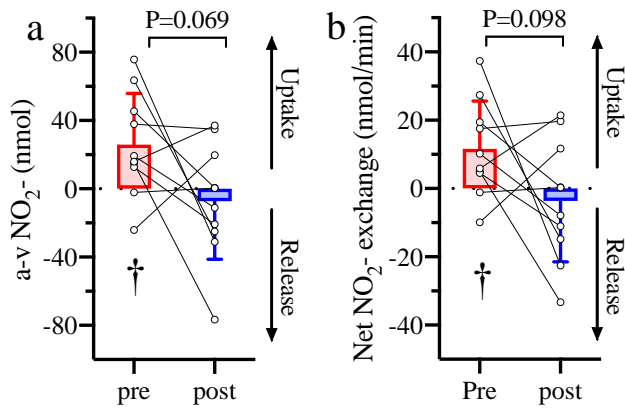

**Supplemental Figure 2. Trans-cerebral plasma nitrite exchange prior to and following haemodilution.**

Panel A depicts the arterial-to-jugular venous (a-v) difference for plasma nitrite (NO<sub>2</sub><sup>-</sup>), while Panel B depicts the cerebral net exchange for plasma NO<sub>2</sub><sup>-</sup>. An obelisk (†) symbol reflects a significant a-v difference or net exchange of plasma NO<sub>2</sub><sup>-</sup> (one-sided t-test). Pre- to post-haemodilution comparisons were conducted with paired t-tests. N=10.

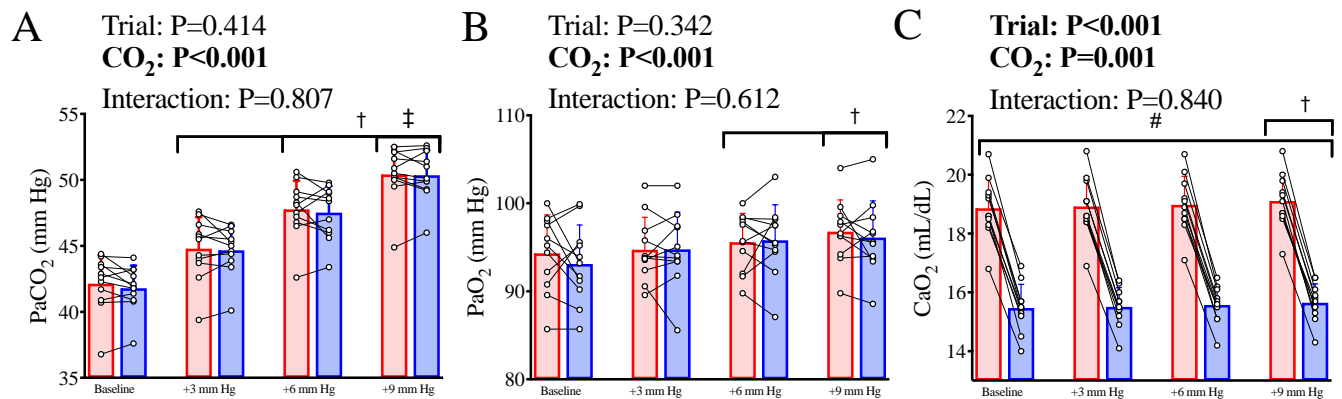

**Supplemental Figure 3. Blood gases during hypercapnia prior to and following haemodilution.**

Pre-haemodilution mean and standard deviation data presented in red, post-haemodilution mean and standard deviation data presented in blue, with individual data overlaid for both. A, partial pressure of arterial CO<sub>2</sub> (PaCO<sub>2</sub>), B, partial pressure of arterial O<sub>2</sub> (PaO<sub>2</sub>), C, arterial O<sub>2</sub> content (CaO<sub>2</sub>). Comparisons conducted using linear mixed-model analyses with Bonferroni adjustments for post-hocs. Asterisk (\*) symbols indicate a difference from baseline (P<0.05) in both trials, obelisk (†) symbols indicate a difference from the +3 mm Hg stage (P<0.05) in both trials, and double dagger (‡) symbols indicate a difference from the +6 mm Hg stage (P<0.05) in both trials. While hash symbols (#) indicate a difference (P<0.05) between pre and post haemodilution in all CVR stages. N=11

1. Friend AT, Rogan M, Rossetti GMK, et al. Bilateral regional extracranial blood flow regulation to hypoxia and unilateral duplex ultrasound measurement error. *Exp Physiol* 2021; 106: 1535–1548.
2. Margaria R. The contribution of hemoglobin to acid-base equilibrium of the blood in health and disease. *Clinical chemistry* 1957; 3: 306.
3. Margaria R. On the state of CO<sub>2</sub> in blood and haemoglobin solutions, with an appendix on some osmotic properties of glycine in solution. *J Physiol* 1931; 73: 311.
4. Geers C, Gros G. Carbon dioxide transport and carbonic anhydrase in blood and muscle. *Physiol Rev* 2000; 80: 681–715.
5. Roughton FJW. RECENT WORK ON CARBON DIOXIDE THE BLOOD TRANSPORT BY THE BLOOD. *Physiol Rev* 1935; 15: 241-296.
6. van Slyke DD. The carbon dioxide carriers of the blood. *Physiol Rev* 1921; 1: 141–176.
7. Douglas AR, Jones NL, Reed JW. Calculation of whole blood CO<sub>2</sub> content. *J Appl Physiol* 1988; 65: 473–477.
8. Kelman GR. Digital computer procedure for the conversion of PCO<sub>2</sub> into blood CO<sub>2</sub> content. *Respiration physiology* 1967; 3: 111–115.
9. Gisolf J, van Lieshout JJ, van Heusden K, et al. Human cerebral venous outflow pathway

- depends on posture and central venous pressure. *J Physiol* 2004; 560: 317–327.
10. Manuel Valdueza J, von Münster T, Hoffman O, et al. Postural dependency of the cerebral venous outflow. *The Lancet (British edition)* 2000; 355: 200–201.
  11. Fencil V. Acid-Base Balance in Cerebral Fluids. In: *Handbook of Physiology, The Respiratory System II, Control of Breathing*. 1986, pp. 115–140.
  12. Tremblay JC, Hoiland RL, Howe CA, et al. Global REACH 2018: High Blood Viscosity and Hemoglobin Concentration Contribute to Reduced Flow-Mediated Dilation in High-Altitude Excessive Erythrocytosis. *Hypertens (Dallas, Tex 1979)* 2019; 73: 1327–1335.
  13. Hoiland RL, Tremblay JC, Stacey BS, et al. Acute reductions in haematocrit increase flow-mediated dilatation independent of resting nitric oxide bioavailability in humans. *J Physiol* 2020; 598: 4225–4236.
  14. Azarov I, Huang KT, Basu S, et al. Nitric Oxide Scavenging by Red Blood Cells as a Function of Hematocrit and Oxygenation. *J Biol Chem* 2005; 280: 39024–39032.
  15. Hoiland RL, Caldwell HG, Carr JMJ, R, et al. Nitric oxide contributes to cerebrovascular shear-mediated dilatation but not steady-state cerebrovascular reactivity to carbon dioxide. *J Physiol* 2021; 0: 1–19.
